# 1 **Determinants of self-treatment with antimalarials in Ndola** 2 **district, Zambia: a cross-sectional study**

3 **Namasiku Grace Susiku<sup>1\*</sup>, Choolwe Jacobs<sup>1</sup>, Jessy Zgambo<sup>1</sup>, Patrick Kaonga<sup>1</sup>, Lungowe**  
4 **Sitali<sup>2</sup>**

5 **1 Department of Epidemiology and Biostatistics, School of Public Health, University of Zambia, Lusaka, Zambia.**

6 **2 Department of Biomedical Sciences, School of Health Sciences, University of Zambia, Lusaka, Zambia.**

7 **Corresponding Author**

8 **[\\*namasikugsusiku@gmail.com](mailto:namasikugsusiku@gmail.com), [namasikugsusiku95@gmail.com](mailto:namasikugsusiku95@gmail.com)**

## 9 **Abstract**

10 Antimalarial drug resistance has been an obstacle in the fight against malaria over the years.  
11 Antimalarial self-medication is one of the factors associated with antimalarial resistance, and is on  
12 the rise globally and has become quite common among developing populations. Self-medication  
13 is when individuals choose and use medications to treat symptoms they perceive or diagnose  
14 themselves, without the guidance of a healthcare professional. This study aimed at investigating  
15 prevalence and determinants of antimalarial drug self-medication among adults in Ndola district,  
16 Zambia. A cross-sectional study was conducted among adults in Ndola district, Zambia in June  
17 2023. Using multistage cluster sampling, 446 participants were randomly selected and interviewed  
18 through a mobile-based structured questionnaire administered by the researchers using Kobo  
19 collect/kobo toolbox. The head of household was the primary participant. Data was then exported  
20 to Microsoft Excel, cleaned and coded, and thereafter exported to STATA version 16.1 for  
21 analysis. Chi-square tests and logistic regression analysis was used to test associations between  
22 categorical variables and to estimate the odds of antimalarial drug self-medication associated with  
23 the explanatory variables. The prevalence of antimalarial drug self-medication was 20% in this  
24 study population and the factors significantly associated were; moderate to mild illness, bad  
25 experience with hospital care, lack of knowledge about antimalarial drug resistance, and the  
26 perception that antimalarial drug self-medication was not risky. The finding that antimalarial self-

27 medication was common in this study population is suggestive of a poor state of the health-care  
28 delivery system possibly due to inadequate manpower, stock out of drugs in health facilities, and  
29 lack of awareness about the risks of self-medication. This further suggests that there is great need  
30 for regulatory authorities to strengthen drug regulations and update the list of over-the-counter and  
31 essential medicines to ensure the safety of public health. In addition, authorities should repackage  
32 malaria sensitization messages to strongly highlight the risks of antimalarial drug self-medication.  
33 *Keywords:* self-medication, drug resistance, prevalence, factors.

## 34 **Introduction**

35 Malaria is a preventable disease that is not so costly to treat, yet continues to thrive as an issue of  
36 public health concern. As of the year 2021, the World Health Organisation (WHO) estimated about  
37 247 million malaria cases globally, an increase from 245 million in 2020 with most of this increase  
38 coming from countries in the WHO African region. The malaria mortality rate was 15.1 deaths per  
39 100,000 of the population at risk in 2020 before decreasing slightly to 14.8 in 2021 (1). Up to 35.4  
40 million disability-adjusted life years (DALYs) are lost in the sub-Saharan Africa region alone due  
41 to malaria mortality and morbidity (2). Zambia carries 2% of the global malaria case burden and  
42 in 2015, an estimated 4 million confirmed malaria cases and 2,389 reported deaths were due to  
43 malaria in Zambia alone (3). Interventions that have been employed to reduce the burden of malaria  
44 include; the scale-up of vector control interventions, including long-lasting insecticidal nets  
45 (LLINs), and indoor residual spraying of insecticide (IRS), coupled with improved case  
46 management using artemisinin-based combination therapy (ACT), and intermittent preventive  
47 therapy with Sulfadoxine-pyrimethamine (SP) for pregnant women (4).

48 However, antimalarial drugs are prone to self-medication in settings where they are not well-  
49 regulated and have easy access to over-the-counter medications without prescription. Antimalarial  
50 drug self-medication can be defined as taking anti-malarial drugs on an individual's initiative  
51 without consulting a qualified prescriber. Several advantages have been associated with  
52 appropriate self-medication, including enhanced access to medication and relief for patients,  
53 increased patient involvement in their healthcare, more effective utilization of healthcare  
54 professionals' expertise, and reduced or optimized governmental healthcare expenditure related to  
55 the treatment of minor health issues. However, self-medication is not without its risks, particularly

56 in cases of irresponsible self-medication. Antimalarial drug self-medication can lead to parasite  
57 resistance to antimalarial drugs that has been reported (3) in many malaria-endemic countries.  
58 Additionally, it can lead to delays in seeking necessary medical advice and masking of serious  
59 illnesses, resulting in paradoxical economic loss due to late diagnosis of malaria with adverse  
60 outcomes. Antimalarial drug resistance has substantially limited treatment options and is now the  
61 greatest obstacle to controlling the disease worldwide (5).

62 Previous studies have demonstrated that antimalarial drug self-medication is common among  
63 developing populations from as low as 4.4% to as high as 80% (6-10). Some factors associated  
64 with antimalarial drug self-medication are age, female gender, marital status, far distance to the  
65 health facility, lack of money, higher level of education, experience with similar disease,  
66 bureaucracies at the health facility, lack of knowledge, mild illness, experience with treating  
67 similar disease, risk perception, easy access to antimalarial drugs and health insurance among  
68 others (6, 7, 11-15).

69 Although some studies have demonstrated the prevalence of self-medication and associated factors  
70 in Zambia (16-19), there are limited studies regarding the prevalence and factors associated with  
71 antimalarial drug self-medication at community level in Ndola district, Zambia. Therefore, this  
72 study aimed at investigating prevalence of antimalarial drug self-medication and associated factors  
73 among adults in Ndola district, Zambia.

## 74 **Methods**

### 75 **Study design and setting**

76 A cross-sectional study design was used to determine the prevalence and factors associated with  
77 antimalarial drug self-medication among adults in Ndola district, Zambia between November  
78 2022, and March 2023. The study was conducted in Ndola district located in Copperbelt province,  
79 Zambia as shown in figure 1. The prevalence of malaria in Copperbelt province ranges from 8% to 11%.  
80 Ndola district has a total area of 965.3 km<sup>2</sup> and as of the 2010 census, its total population was  
81 estimated to be 451,246 (223,020 males and 228,226 females), with a population density of  
82 467.5/km<sup>2</sup> (Census, 2010). The district is politically divided into 28 wards namely, Chichele,  
83 Chifubu, Chipulukusu, Daj Hammarskjold, Fibobe, Itawa, Kabushi, Kafubu, Kaloko, Kamba,

84 Kaniki, Kanini, Kansenshi, Kantolomba, Kavuu, Kawama, Lubuto, Masala, Mukuba,  
85 Munkulungwe, Mushili, Nkwazi, Pamodzi, Skyways, Toka, Twapia, Twashuka and Yengwe. Only  
86 eight of these wards were included in the study by random selection and these were Lubuto, Itawa,  
87 Chifubu, Chipulukusu, kansenshi, Nkwazi, Kafubu, and Twapia. The selected wards accounted  
88 for 29% of all the wards thus, were representative of the total population.

## 89 **Study population and sampling strategy**

90 The study population was adult residents of Ndola district, Copperbelt province, Zambia. Since  
91 the study population was spread across a wide geographical area, a multistage cluster sampling  
92 was used. The sample size was calculated using the proportion formula which gave a minimum  
93 sample size of 372 to which 20% was added to account for non-response which brought the total  
94 sample size to 447. Probability proportionate to size sampling was used to allocate a representative  
95 sample to each of the wards. Thereafter, systematic random sampling was employed to select the  
96 households from which participants were sampled in each ward. A central location was selected  
97 in each ward at which a direction to sample from was randomly selected. The lottery method was  
98 used to select the first house from which a participant was randomly selected and the calculated  
99 Kth interval was used to skip households in the selected direction of the central point. At every  
100 systematically selected household, we requested for the head of household to interview, in whose  
101 absence another participant was then selected. Where the selected participant did not meet the  
102 eligibility criteria, another participant from the same household who was eligible to participate in  
103 the study was randomly selected. This was done in all selected households in each ward until the  
104 sample size was met.

## 105 **Data collection tools and procedures**

106 Data was collected primarily through structured interviews using a pre-tested structured  
107 questionnaire. Prior to administering the questionnaire, the interviewer presented different  
108 antimalarial drugs to the participants to find out if they had used any antimalarials between  
109 November 2022 and March 2023. This was done to fulfill the eligibility criteria and prevent a  
110 waste of resources. Antimalarial drug Self-medication practice, the outcome variable, was assessed  
111 by the selection and use of antimalarial drugs by individuals or a member of the individual's family  
112 without a physician's order to treat self-recognized or self-diagnosed conditions in the past

113 6 months. Data collection was also done during evening hours to capture those who worked during  
114 the day.

## 115 **Description of variables**

116 **Dependent/outcome Variable:** The outcome variable was “antimalarial drug self-medication”  
117 which was dichotomized as “yes” if the respondent did not seek medical advice before antimalarial  
118 medication and “no” if the respondent sought medical advice before antimalarial medication.

119 **Independent/ explanatory variables:** These include age, gender, marital status, level of  
120 education, employment status, monthly income, severity of illness, underlying health conditions,  
121 duration of symptoms prior to self-medication, name of drug taken, health insurance, ready access  
122 to health facility, ready access to drugs, past experience with hospital care, level of knowledge  
123 about antimalarial drug resistance and risk perception around antimalarial drug self-medication.

## 124 **Data management and analysis**

125 To increase efficiency, reduce cost, and ensure quality of the data, kobo toolbox/Kobo collect was  
126 used to administer the structured questionnaire (20). The mobile-based data collection method was  
127 ideal for enhancing credibility of the data as it incorporates various quality-checking tools  
128 including completeness and consistency checks (20). Thereafter, Data was directly exported to  
129 STATA version 16.0 for analysis. Microsoft Excel spreadsheets containing variables of interest  
130 were imported into STATA version 16.1 MP (Stata Corporation, College Station, Texas, USA) for  
131 analysis. At analysis, descriptive statistics using frequencies were reported for Categorical  
132 variables. The Pearson’s Chi-square test was used to investigate association between categorical  
133 variables. A mixed-effect logistic regression was used to perform multivariable analysis to  
134 estimate the odds of antimalarial drug self-medication associated with the explanatory variables.  
135 A mixed-effect model was preferred for this particular study to account for clustering effect so that  
136 the results can be used to make inferences on the entire district and not just on the study participants  
137 (21). An investigator-led stepwise approach was undertaken to fit the best model using the  
138 likelihood ratio tests coupled with the Akaike Information Criterion (AIC) and the Bayesian  
139 Information Criterion (BIC). Multicollinearity of the models was checked using the tolerance and  
140 inflation statistics to fulfill the law of parsimony. Sensitivity and specificity tests were run to check

141 the performance of the best model and to ascertain that the model was not classifying participants  
142 by chance, the Receiver Operations Characteristic Curve (ROC) was used.

## 143 **Ethical consideration**

144 Ethical clearance was sought and granted from the University of Zambia Biomedical Research  
145 Ethics Committee (UNZABREC) REF. No. 3603-2023, and the National Health Research  
146 Authority (NHRA) Ref No. NHRA015/03/07/2023. Permission to conduct the study was also  
147 sought and granted from Ndola District Health Office. Detailed study information sheets were  
148 availed to the participants prior to obtaining informed consent. Participants were allowed to  
149 withdraw from the study at any point during the interview and no individual was coerced to  
150 participate in the study. Permission was obtained from the head of the household even when he/she  
151 would not be the primary respondent. The study maintained the highest level of confidentiality as  
152 participants were identified by identification numbers rather than their names nor other personal  
153 information.

## 154 **Results**

### 155 **Social demographic characteristics of the adult participants of**

### 156 **Ndola district, Zambia; June 2023**

157 Participants' social demographic characteristics are presented in Table 1. The study included 446  
158 eligible participants aged between 18 and 84 years with the mean age of 37 ( $\pm$  14) years. About  
159 three-quarters (74.2%, 331/446) of the participants were females. Majority (61%, 272/446) were  
160 married and 46% (205/446) had attended up to secondary education. Above two-thirds (69.7%,  
161 311/446) were unemployed. About 70.2% (313/446) of the participants did not earn a monthly  
162 income.

163 Table 1: Social demographic characteristics of adult participants of Ndola District, Zambia; June  
164 2023

| Variable | Frequency<br>(%) | Antimalarial Drug Self-Medication | P-Value |
|----------|------------------|-----------------------------------|---------|
|----------|------------------|-----------------------------------|---------|

|                           |            |           |      |
|---------------------------|------------|-----------|------|
| <b>Age in years</b>       |            |           | 0.08 |
| 18-29                     | 174 (39)   | 29 (32.2) |      |
| 30-39                     | 113 (25.3) | 32 (35.6) |      |
| 40-49                     | 80 (17.9)  | 18 (20)   |      |
| 50-59                     | 42 (9.4)   | 5 (5.6)   |      |
| ≥ 60                      | 37 (8.3)   | 6 (6.7)   |      |
| <b>Gender</b>             |            |           | 0.45 |
| Male                      | 115 (25.8) | 26 (28.9) |      |
| Female                    | 331 (74.2) | 64 (71.1) |      |
| <b>Marital status</b>     |            |           | 0.35 |
| Single                    | 174 (39)   | 36 (40)   |      |
| Married                   | 272 (61)   | 54 (60)   |      |
| <b>Level of education</b> |            |           | 0.26 |
| No education/Primary      | 160 (35.8) | 25 (27.8) |      |
| Secondary                 | 205 (46)   | 45 (50)   |      |
| Tertiary                  | 81 (18.2)  | 20 (22.2) |      |
| <b>Employment status</b>  |            |           | 0.07 |
| Unemployed                | 311 (69.7) | 56 (62.2) |      |
| Employed                  | 135 (30.3) | 39 (37.8) |      |
| <b>Monthly income</b>     |            |           | 0.02 |
| No income                 | 313 (70.2) | 56 (62.2) |      |
| With income               | 133 (29.8) | 34 (37.8) |      |

165 *Pearson Chi-square test was used to generate the p-values, p-value is significant at <0.05.*

## 166 **Clinical characteristics of adult participants of Ndola district,**

### 167 **Zambia; June 2023**

168 Participants' clinical characteristics are displayed in Table 2. Among the 446 participants, 189  
 169 (42.2%) reported having moderate to mild illness before medication. The majority, 366/446  
 170 (82.1%) of the participants did not suffer from any underlying health condition. The larger  
 171 proportion 359/446 (80.8%), of participants in this study experienced malaria symptoms for more  
 172 than twenty-four hours before medication and more than three quarters, 383/446 (85.9%) of the

173 participants took ACT. Three Hundred and Eighty-six (86.6%, 386/446)) of the participants  
 174 perceived antimalarial drug self-medication as being risky.

175 Table 2: Clinical characteristics of adult participants of Ndola District, Zambia; June 2023

| Variable                                                        | Frequency (%) | Antimalarial Drug Self-Medication | P-Value           |
|-----------------------------------------------------------------|---------------|-----------------------------------|-------------------|
| <b>Severity of illness</b>                                      |               |                                   | 0.002             |
| Moderate to mild                                                | 189 (42.4)    | 53 (58.9)                         |                   |
| Severe/ Very Severe                                             | 257 (57.6)    | 37 (41.1)                         |                   |
| <b>Underlying health conditions</b>                             |               |                                   | 0.57              |
| No                                                              | 366 (82.1)    | 72 (80)                           |                   |
| Yes                                                             | 80 (17.9)     | 18 (20)                           |                   |
| <b>Duration of symptoms prior to medication</b>                 |               |                                   | 0.47              |
| < 24hours                                                       | 87 (19.5)     | 20 (22.2)                         |                   |
| > 24hours                                                       | 359 (80.5)    | 70 (77.8)                         |                   |
| <b>Name of drug taken</b>                                       |               |                                   | 0.04 <sup>f</sup> |
| Analgesics                                                      | 11 (2.5)      | 4 (4.4)                           |                   |
| Antibiotics                                                     | 2 (0.5)       | 1 (1.1)                           |                   |
| SP                                                              | 50 (11.2)     | 16 (17.8)                         |                   |
| ACT                                                             | 383 (85.9)    | 69 (76.7)                         |                   |
| <b>Risk perception around antimalarial drug self-medication</b> |               |                                   | < 0.001           |
| Less/ Not Risky                                                 | 60 (13.4)     | 32(35.6)                          |                   |
| Risky                                                           | 386 (86.6)    | 58 (64.4)                         |                   |

176 *Pearson Chi-square test was used to generate the p-values, p-value is significant at <0.05;*

177 *f=Fisher's exact test was used where at least one of the expected values was less than 5.*



178 **Healthcare-related characteristics of adult participants of Ndola**

179 **district, Zambia; June 2023**

180 Healthcare-related characteristics of the study participants are presented in Table 3. The majority  
 181 of the participants had ready access to drugs and health facilities, 408/446 (91.5%) and 393/446  
 182 (88.1%) respectively. The larger proportion, 343/446 (76.9%) of participants were not on health  
 183 insurance. Most, 388/446 (87%), of the participants in this study recorded having had good/very  
 184 good experience with hospital care.

185 Table 3: Healthcare-related characteristics of adult participants of Ndola district, Zambia; June  
 186 2023

| Variable                                  | Frequency (%) | Antimalarial Drug Self-Medication | P-Value |
|-------------------------------------------|---------------|-----------------------------------|---------|
| <b>Ready access to drugs</b>              |               |                                   | 0.26    |
| No (> 5km away)                           | 38 (8.5)      | 5 (5.6)                           |         |
| Yes (< 5km away)                          | 408 (91.5)    | 85 (94.4)                         |         |
| <b>Ready access to health facility</b>    |               |                                   | 0.33    |
| No (> 5km away)                           | 53 (11.9)     | 8 (8.9)                           |         |
| Yes (< 5km away)                          | 393 (88.1)    | 82 (91.1)                         |         |
| <b>Health insurance</b>                   |               |                                   | 1       |
| No                                        | 343 (76.9)    | 69 (67.7)                         |         |
| Yes                                       | 103 (23.1)    | 21 (32.3)                         |         |
| <b>Past experience with hospital care</b> |               |                                   | < 0.001 |
| Bad/Very Bad                              | 58 (13)       | 25 (27.8)                         |         |
| Good/ Very Good                           | 388 (87)      | 65 (72.2)                         |         |

187 *Pearson Chi-square test was used to generate the p-values, p-value is significant at <0.05.*

188 **Prevalence of antimalarial drug self-medication**

189 Out of the 446 participants in this study, about 90 self-medicated with antimalarials (20%; 95% CI  
 190 0.17-0.24). Antimalarial drug self-medication was most common among participants who were;  
 191 female, aged between 30 and 39 years old, married, unemployed, attended secondary education,  
 192 suffered moderate to mild illness prior to medication, did not have underlying health conditions,  
 193 experienced symptoms for more than twenty four hours before medication, took ACTs, perceived  
 194 antimalarial drug self-medication as being not risky, had ready access to drugs and health facilities  
 195 and those that had good experience with hospital care.

## 196 **Factors associated with antimalarial drug self-medication**

197 Results from the univariate and multivariable logistic regression are presented in Table 4. The  
 198 association between severity of illness and antimalarial drug self-medication was that, suffering  
 199 from severe illness significantly reduced the chance of antimalarial drug self-medication by 52%  
 200 compared to suffering from moderate to mild illness (AOR=0.48, 95% CI 0.29-0.79, p-value =  
 201 0.004). Having good experience with hospital care significantly reduced the odds of antimalarial  
 202 drug self-medication by a factor of 0.28 compared to having bad experience (AOR=0.28, 95% CI  
 203 0.15-0.52, p-value < 0.001). Additionally, the risk of antimalarial drug self-medication among  
 204 participants who were knowledgeable about antimalarial drug resistance was 0.48 times lower than  
 205 the risk of antimalarial drug self-medication among participants who were not knowledgeable  
 206 (AOR=0.48, 95% CI 0.28-0.8, p-value = 0.005). Finally, the odds of antimalarial drug self-  
 207 medication among participants who perceived antimalarial drug self-medication to be risky  
 208 reduced by 84% compared to those who perceived antimalarial drug self-medication as not being  
 209 risky (AOR=0.26, 95% CI 0.12-0.58, p-value = 0.001).

210 Table 4: Factors Associated with Antimalarial Drug Self-medication Among Adults in Ndola  
 211 District, Zambia.

| Variable                   | Crude Estimates |         | Adjusted Estimates |         |
|----------------------------|-----------------|---------|--------------------|---------|
|                            | OR (95% CI)     | p-value | AOR (95% CI)       | p-value |
| <b>Monthly income</b>      |                 |         |                    |         |
| No income                  | Ref             | N/A     | Ref                | N/A     |
| With income                | 1.31 (1.08-1.6) | 0.007   | 1.95 (1.19-3.2)    | 0.008   |
| <b>Severity of illness</b> |                 |         |                    |         |

|                                                                 |                  |         |                  |                  |
|-----------------------------------------------------------------|------------------|---------|------------------|------------------|
| Moderate to mild                                                | Ref              | N/A     | Ref              | N/A              |
| Severe                                                          | 0.43 (0.27-0.69) | <0.001  | 0.48 (0.29-0.79) | <b>0.004</b>     |
| <b>Ready access to health facility</b>                          |                  |         |                  |                  |
| No (> 5km away)                                                 | Ref              | N/A     | Ref              | N/A              |
| Yes (< 5km away)                                                | 1.48 (0.67-3.27) | 0.33    | 2.22 (0.73-6.75) | 0.16             |
| <b>Ready access to drugs</b>                                    |                  |         |                  |                  |
| No (> 5km away)                                                 | Ref              | N/A     | Ref              | N/A              |
| Yes (< 5km away)                                                | 1.74 (0.66-4.58) | 0.27    | 0.86 (0.24-3.11) | 0.82             |
| <b>Past experience with hospital care</b>                       |                  |         |                  |                  |
| Bad                                                             | Ref              | N/A     | Ref              | N/A              |
| Good                                                            | 0.27 (0.15-0.48) | <0.001  | 0.28 (0.15-0.52) | <b>&lt;0.001</b> |
| <b>Knowledge about antimalarial drug resistance</b>             |                  |         |                  |                  |
| Not knowledgeable                                               | Ref              | N/A     | Ref              | N/A              |
| Knowledgeable                                                   | 0.39 (0.24-0.63) | < 0.001 | 0.48 (0.28-0.8)  | <b>0.005</b>     |
| <b>Risk perception around antimalarial drug self-medication</b> |                  |         |                  |                  |
| Not /Less Risky                                                 | Ref              | N/A     | Ref              | N/A              |
| Risky                                                           | 0.19 (0.57-2.27) | <0.001  | 0.26 (0.12-0.58) | <b>0.001</b>     |

212 *Data presented as odds ratios (OR) with confidence intervals (CI); p-value is significant at < 0.05,*

213 *Ref: Reference group (category), AOR; Adjusted Odds Ratio.*

## 214 Discussion

215 The prevalence of antimalarial drug self-medication was common at 20% and could be as low as  
 216 17% and as high as 24% among adults in Ndola district, Zambia. Factors that were statistically  
 217 significantly associated with antimalarial drug self-medication are; moderate to mild illness, bad  
 218 experience with hospital care, lack of knowledge about antimalarial drug resistance, and the  
 219 perception that antimalarial drug self-medication is not risky.

220 The finding that self-medication with antimalarial drugs is common (20%; 95% CI 0.17-0.24) in  
 221 our study population is in line with what other studies found in similar settings; 22.6% in Nigeria

222 (22) and 19% in Tanzania (23). Contrary to this, some studies found a higher prevalence such as  
223 43.4% among community members in Khartoum state, Sudan (11), 79.5% among undergraduate  
224 students in Khartoum state, Sudan (7) and 49.3% in Cameroon (6), probably due to differences in  
225 methodologies and study populations. This finding suggests a poor healthcare delivery system in  
226 Ndola district, Zambia. A shortage of consumables in health facilities could be a reason for the  
227 high prevalence of antimalarial drug self-medication. People visit health facilities with the hope  
228 that they will return home with a solution to their illness such as medication. However, in  
229 circumstances where there is a stock out of drugs in health facilities, people tend to shun away  
230 from visiting health facilities for medical advice when unwell, rather they purchase medication  
231 from pharmacies and other sources because they want to save time. Long queuing time at health  
232 facilities is another reason for antimalarial drug self-medication, cited by participants in this study.  
233 Furthermore, participants in this study who had suffered from malaria in the past expressed a high  
234 level of certainty about malaria symptoms and would claim to have malaria whenever they  
235 experienced such symptoms, prompting them to self-medicate. The prevalence of antimalarial drug  
236 self-medication realized from this study further suggests that there is an urgent need for regulatory  
237 authorities to strengthen drug regulations and update the list of over-the-counter and essential  
238 medicines to ensure the safety of consumers.

239 The finding that participants who suffered from moderate to mild illness were more likely to self-  
240 medicate with antimalarial drugs is similar to what was found in Cameroon (6) and China (24)  
241 despite the difference in study populations. A possible explanation for this could be that when the  
242 symptoms are mild, people opt to use their experience with treatment of similar symptoms to self-  
243 medicate rather than visiting the health facility for a diagnosis. However, when the disease is  
244 severe, the amount of pain felt prompts the patient to visit a health facility for treatment for the  
245 fear of dying in their home. This study also revealed that participants who had very bad experience  
246 with hospital care were significantly more likely to self-medicate with antimalarial drugs, similar  
247 to what was found in China (24). This finding reflects inefficiency in the primary delivery of  
248 healthcare possibly due to inadequate manpower and poor work culture of health professionals. It  
249 is quite sensible that when a person has had a bad experience with hospital care, they would never  
250 want to go back there, rather they will opt to self-medicate. This finding suggests that there may  
251 be need to scale up man-power in health facilities for efficiency.

252 In most instances, an individual will not indulge in an act or behaviour which they perceive to be  
253 risky (25). Therefore, people that perceive antimalarial drug self-medication to be very risky are  
254 less likely to self-medicate due to the fear of adverse health effects as observed in this study. This  
255 finding is in line with what a similar study found in Saudi Arabia (26). Finally, a lack of knowledge  
256 about antimalarial drug resistance was found to significantly increase the odds of antimalarial drug  
257 self-medication in this study population. This is in relation to the fact that self-medication is linked  
258 to drug resistance. However, this finding is contrary to what was found in Nepal (27) probably due  
259 to the differences in methodology and study populations.

260 Previous studies found significant associations between antimalarial drug self-medication and  
261 factors such as female gender, marital status, lack of income, ready access to drugs, far distance to  
262 the health facility and health insurance. On the contrary, none of these associations were significant  
263 in this study most likely due to differences in study populations, sample sizes and methodologies.

## 264 **Conclusion**

265 Antimalarial drug self-medication is common among adults in Ndola district, Zambia and the  
266 factors associated are: moderate to mild illness, bad experience with hospital care, lack of  
267 knowledge about antimalarial drug resistance, and the perception that antimalarial drug self-  
268 medication is not risky. It is worth noting that, although this study has successfully demonstrated  
269 the prevalence of antimalarial drug self-medication and associated factors in Ndola district, one  
270 participant was not included in the analysis due to incomplete responses. However, this was  
271 accounted for by the large sample size which increased the power of this study, making the results  
272 statistically reliable. It would be critical to inform and educate the population on the dangers of  
273 self-medication and for regulatory authorities to strengthen drug regulations and update the list of  
274 over-the-counter and essential medicines to ensure the safety of citizens. Authorities need also to  
275 ensure that there is constant supply of consumables in health facilities such as antimalarial drugs  
276 to encourage people to seek medical advice when ill.

## 277 **Author Contributions**

278 **Conceptualization:** Namasiku Grace Susiku, Lungowe Sitali-Zimba, Choolwe Jacobs, Jessy  
279 Zgambo-Akatumwa

280 **Data curation:** Namasiku Grace Susiku

281 **Formal analysis:** Namasiku Grace Susiku

282 **Investigation:** Namasiku Grace Susiku

283 **Methodology:** Namasiku Grace Susiku, Lungowe Sitali-Zimba, Choolwe Jacobs, Jessy Zgambo-  
284 Akatumwa

285 **Project administration:** Namasiku Grace Susiku

286 **Resources:** Namasiku Grace Susiku

287 **Software:** Namasiku Grace Susiku

288 **Supervision:** Namasiku Grace Susiku, Lungowe Sitali-Zimba, Choolwe Jacobs, Jessy Zgambo-  
289 Akatumwa

290 **Validation:** Namasiku Grace Susiku, Lungowe Sitali-Zimba, Choolwe Jacobs, Jessy Zgambo-  
291 Akatumwa

292 **Visualization:** Namasiku Grace Susiku, Lungowe Sitali-Zimba, Choolwe Jacobs, Jessy Zgambo-  
293 Akatumwa

294 **Writing - original draft:** Namasiku Grace Susiku, Lungowe Sitali-Zimba, Choolwe Jacobs, Jessy  
295 Zgambo-Akatumwa, Patrick Kaonga

296 **Writing – review & editing:** Namasiku Grace Susiku, Lungowe Sitali-Zimba, Choolwe Jacobs,  
297 Jessy Zgambo-Akatumwa, Patrick kaonga

## 298 **Acknowledgments**

299 Namasiku Grace Susiku is a recipient of the Norwegian Programme for Capacity Development in  
300 Higher Education and Research for Development (NORHED PRICE scholarship). We are grateful  
301 for the support without whom this study could have not been possible. We further extend our  
302 gratitude to the Ndola District Health Office (NDHO) which facilitated the implementation of this  
303 study. We are also grateful to all the participants who gave their consent for the study. Finally, we

304 are grateful to members of the faculty of Epidemiology and Biostatistics, University of Zambia,  
305 for their guidance throughout this study.

## 306 **References**

- 307 1. Organization WH. WHO guidelines for malaria, 3 June 2022. World Health Organization;  
308 2022.
- 309 2. Fernando SD, Rodrigo C, Rajapakse S. The 'hidden' burden of malaria: cognitive  
310 impairment following infection. *Malaria journal*. 2010;9:1-11.
- 311 3. Organization WH. World malaria report 2022: World Health Organization; 2022.
- 312 4. Kigozi SP, Kigozi RN, Epstein A, Mpimbaza A, Sserwanga A, Yeka A, et al. Rapid shifts  
313 in the age-specific burden of malaria following successful control interventions in four regions of  
314 Uganda. *Malar J*. 2020;19(1):128.
- 315 5. Khatoon L, Baliraine FN, Bonizzoni M, Malik SA, Yan G. Prevalence of antimalarial drug  
316 resistance mutations in *Plasmodium vivax* and *P. falciparum* from a malaria-endemic area of  
317 Pakistan. *The American journal of tropical medicine and hygiene*. 2009;81(3):525.
- 318 6. Kojom L, Ntumba A, Nyabeyeu HN, Wepnje GB, Tonga C, Lehman L. Prevalence,  
319 patterns and predictors of self-medication with anti-malarial drugs among Cameroonian mothers  
320 during a recent illness episode. *Journal of Medical and Biomedical Sciences*. 2018;7(1):29-39.
- 321 7. Awad AI, Eltayeb IB. Self-medication practices with antibiotics and antimalarials among  
322 Sudanese undergraduate university students. *Annals of Pharmacotherapy*. 2007;41(7-8):1249-55.
- 323 8. Kimoloi S, Okeyo N, Ondigo BN, Langat BK. Choice and sources of antimalarial drugs  
324 used for self-medication in Kisumu, Western Kenya. *African journal of pharmacology and  
325 therapeutics*. 2013;2(4).
- 326 9. Mwita S, Meja O, Katabalo D, Richard C. Magnitude and factors associated with anti-  
327 malarial self-medication practice among residents of Kasulu Town Council, Kigoma-Tanzania.  
328 *African Health Sciences*. 2019;19(3):2457-61.
- 329 10. Akilimali A, Bisimwa C, Aborode AT, Biamba C, Sironge L, Balume A, et al. Self-  
330 medication and Anti-malarial Drug Resistance in the Democratic Republic of the Congo (DRC):  
331 A silent threat. *Tropical Medicine and Health*. 2022;50(1):73.
- 332 11. Awad A, Eltayeb I, Matowe L, Thalib L. Self-medication with antibiotics and antimalarials  
333 in the community of Khartoum State, Sudan. *J Pharm Pharm Sci*. 2005;8(2):326-31.

- 334 12. Chipwaza B, Mugasa JP, Mayumana I, Amuri M, Makungu C, Gwakisa PS. Self-  
335 medication with anti-malarials is a common practice in rural communities of Kilosa district in  
336 Tanzania despite the reported decline of malaria. *Malaria journal*. 2014;13:1-11.
- 337 13. Teke GN, Nde SL, Suh MB. Self medication practice and associated factors at the regional  
338 hospital Bamenda, Cameroon: a prospective study. *International Journal of Basic & Clinical*  
339 *Pharmacology*. 2017;6(7):1560.
- 340 14. Marealle Ai, Kirutu P. Self-Medication With Anti-Malarial Medicines Among High  
341 School Students in Dar Es Salaam, Tanzania. *International Journal of Pharmacy and*  
342 *Pharmaceutical Sciences*. 2018;10(8):101.
- 343 15. Torres N, Chibi B, Middleton L, Solomon V, Mashamba-Thompson T. Evidence of factors  
344 influencing self-medication with antibiotics in low and middle-income countries: a systematic  
345 scoping review. *Public health*. 2019;168:92-101.
- 346 16. Banda O, Vlahakis PA, Daka V, Matafwali SK. Self-medication among medical students  
347 at the Copperbelt University, Zambia: a cross-sectional study. *Saudi Pharmaceutical Journal*.  
348 2021;29(11):1233-7.
- 349 17. Nkhoma L. Factors associated with self-medication in Lusaka, Zambia: a cross-sectional  
350 study of Chelston township: The University of Zambia; 2017.
- 351 18. Sayi A. Perspectives and practices of self-medication in Shibuyunji district, Lusaka  
352 province, Zambia: University of Zambia; 2019.
- 353 19. Mudenda S, Daka V, Matafwali SK, Kanaan MHG, Abdullah SS, Mohamed S, et al.  
354 Prevalence of Self-Medication and Associated Factors among Healthcare Students during the  
355 COVID-19 Pandemic: A Cross-Sectional Study at the University of Zambia. *Open Journal of*  
356 *Social Sciences*. 2023;11(10):340-63.
- 357 20. Lakshminarasimhappa M. Web-based and smart mobile app for data collection: Kobo  
358 Toolbox/Kobo collect. *Journal of Indian Library Association*. 2022;57(2):72-9.
- 359 21. Moen EL, Fricano-Kugler CJ, Luikart BW, O'Malley AJ. Analyzing clustered data: why  
360 and how to account for multiple observations nested within a study participant? *Plos one*.  
361 2016;11(1):e0146721.
- 362 22. Auta A, Shalkur D, Omale S, Abiodun A. Medicine knowledge and self-medication  
363 practice among students. 2012.



- 364 23. Kajeguka DC, Moses E. Self-medication practices and predictors for self-medication with  
365 antibiotics and antimalarials among community in Mbeya City, Tanzania. Tanzania Journal of  
366 Health Research. 2017;19(4).
- 367 24. Lei X, Jiang H, Liu C, Ferrier A, Mugavin J. Self-medication practice and associated  
368 factors among residents in Wuhan, China. International journal of environmental research and  
369 public health. 2018;15(1):68.
- 370 25. Wärneryd K-E. Risk attitudes and risky behavior. Journal of economic psychology.  
371 1996;17(6):749-70.
- 372 26. Al-Qahtani AM, Shaikh IA, Shaikh MAK, Mannasaheb BA, Al-Qahtani FS. Prevalence,  
373 perception, and practice, and attitudes towards self-medication among undergraduate medical  
374 students of Najran University, Saudi Arabia: a Cross-Sectional Study. Risk management and  
375 healthcare policy. 2022:257-76.
- 376 27. Gyawali S, Shankar PR, Poudel PP, Saha A. Knowledge, attitude and practice of self-  
377 medication among basic science undergraduate medical students in a medical school in western  
378 Nepal. Journal of clinical and diagnostic research: JCDR. 2015;9(12):FC17.
- 379

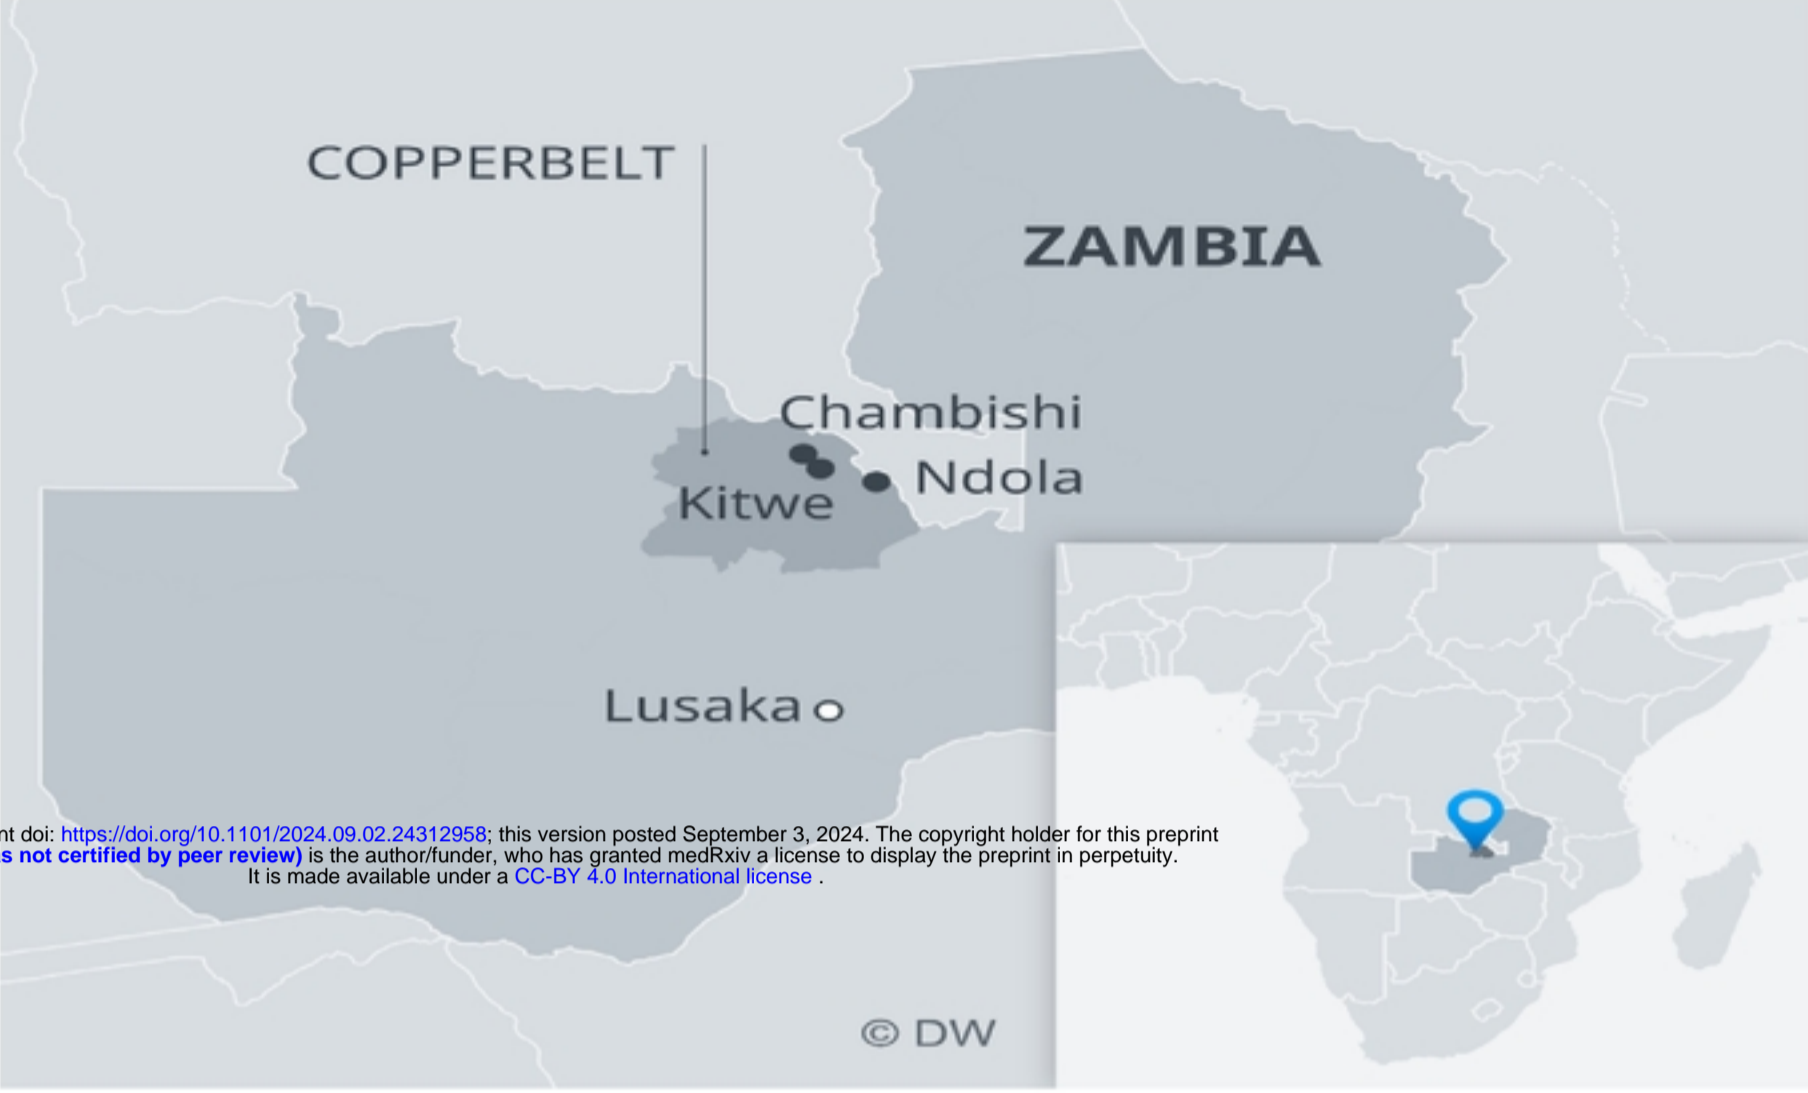

medRxiv preprint doi: <https://doi.org/10.1101/2024.09.02.24312958>; this version posted September 3, 2024. The copyright holder for this preprint (which was not certified by peer review) is the author/funder, who has granted medRxiv a license to display the preprint in perpetuity. It is made available under a [CC-BY 4.0 International license](https://creativecommons.org/licenses/by/4.0/).

Figure 1
